# Supplementary material
Source: PubMed Central journal article supplement (PMC5423466)
Supplement: NIHMS861750-supplement.pdf [file NIHMS861750-supplement.pdf]

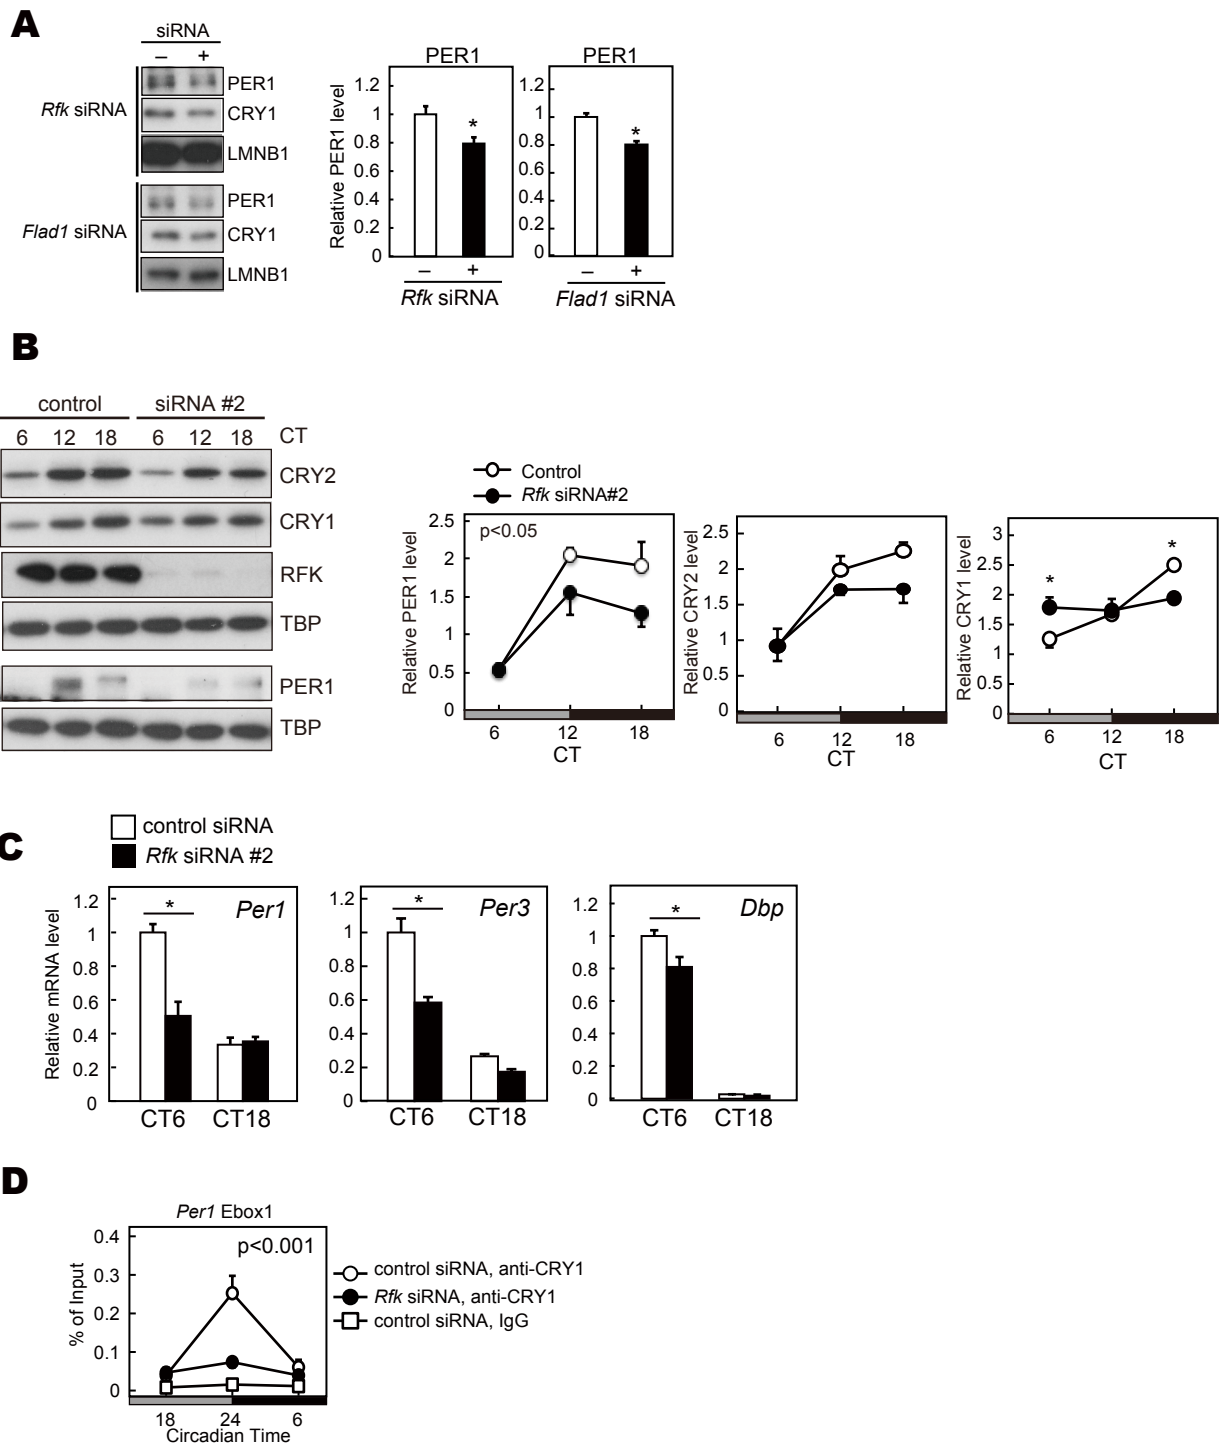

**Figure S1**

**Figure S1. Effects of *Rfk* knockdown on clock protein expression and DNA binding of CRY1, related to Figure 4.**

(A) CRY1 and PER1 expression in NIH3T3 cells transfected with *Rfk* or *Flad1* siRNAs (n=3, \*: p<0.05 by Student's *t*-test). (B) Nuclear protein levels of PER1, CRY1, CRY2 and RFK in DD by *Rfk* siRNA#2. Mice fed riboflavin-free diet for 2 weeks were subjected to tail vein injection of *Rfk* siRNA#2 or control siRNA. Six days after the injection, mice were sacrificed at indicated time points in DD. Data are shown as means  $\pm$  SEM (n=3, \*:p<0.05 by two-way ANOVA followed by post-hoc test). (C) mRNA levels of indicated clock genes in *Rfk* knockdown mice. mRNA levels were normalized to *G3pdh*. Data are shown as means  $\pm$  SEM (n=3, \*:p<0.05 by two-way ANOVA followed by post-hoc test). (D) ChIP assay of CRY1 protein in *Rfk* knockdown mice. Mice were injected with *Rfk* siRNA and sacrificed in DD at specified time. CRY1 occupancy at the *Per1* promoter containing E-box was analyzed by PCR using specific primers. Data are shown as means  $\pm$  SEM (n=3, \*:p<0.05 by two-way ANOVA followed by post-hoc test).

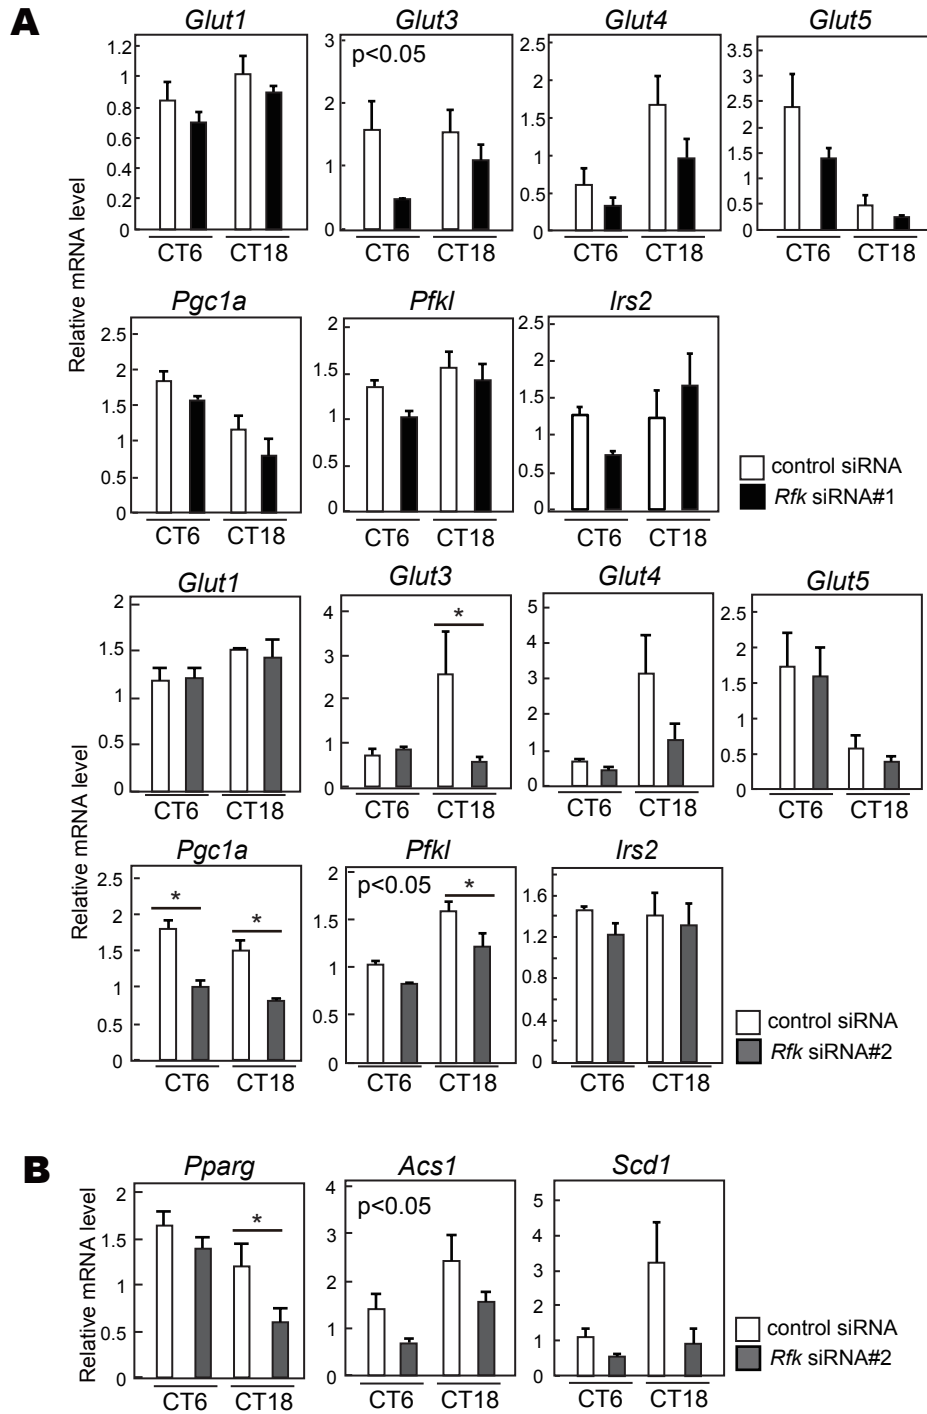

**Figure S2**

**Figure S2. Expression of clock-controlled genes in *Rfk* knockdown mouse, related to Figure 5.**

(A) (B) mRNA levels of indicated genes in *Rfk* knockdown mouse. Mice fed riboflavin-free diet for 2 weeks were subjected to tail vein injection of *Rfk* siRNA#1 or control siRNA. Six days after the injection, mice were sacrificed at indicated time points in DD. mRNA levels were normalized to *G3pdh*. Data are shown as means  $\pm$  SEM (n=3, \*:p<0.05 by two-way ANOVA followed by post-hoc test). *Glut*; Glucose transporter, *Pgc1a*; *Ppparg* coactivator 1a, *Pfkl*; Phosphofructokinase, *Irs2*; Insulin receptor substrate2. *Pparg*; Peroxisome proliferator activated receptor gamma, *Acs1*; Acetyl-coenzyme A synthetase 1, *Scd1*; Stearoyl-coenzyme A desaturase 1.



**Figure S3. Metabolomics analysis of *RFK* knockdown cells and FAD-treated cells, related to Figure 5.**

Cells were treated with 100  $\mu$ M FAD for 24 hours after siRNA. All cells were isotope labeled with  $^{13}\text{C}_6$  D-glucose for metabolomics analysis. (A) Principal component analysis of metabolomics data. FAD treatment had a large effect on metabolism. (B) Simplified metabolism map showing affected pathways. Metabolites labeled with red showed induced synthesis from isotope labeled glucose, while those labeled with blue showed reduction. (C) Heat map for metabolites related to TCA cycle and nucleotide synthesis. (D) Relative amounts of currency metabolites. Data were shown as means  $\pm$  SEM (n=3, \*:p<0.05, \*\*:p<0.01, \*\*\*:p<0.0001 by one-way ANOVA).

**SUPPELEMENTAL EXPERIMENTAL PROCEDURES**

**Plasmids construction**

DNA constructs used for transfections are as follows (Hirano et al., 2016b): hCRY2-WT-Myc-His/pcDNA3.1, FLAG-hCRY2-WT/p3 $\times$ FLAG-CMV-10, FLAG-hCRY2-A260T/p3 $\times$ FLAG-CMV-10, FLAG-hFBXL3/p3 $\times$ FLAG-CMV-10, HA-hFBXL3/pCMV-tag2B. For knockdown of human *Rfk*, *CRY1*, *CRY2* and mouse *Rfk* and *Flad1*, Hs\_*RFK*, Hs\_*CRY1*, Hs\_*CRY2*, Mm\_*Rfk* and Mm\_*Flad1* FlexiTube siRNA (QIAGEN) and control siRNA (QIAGEN) were purchased. shRNA constructs of mouse *Rfk* were created by inserting shRNA target sequences into pSilencer3.1-H1-puro. The target sequences were: *Rfk* shRNA#1 5'-ATAGATGTAATATGTTGATTAA-3', *Rfk* shRNA#2 5'-ACAGGCACTTAAACATAATTTA-3', *Rfk* shRNA#3 5'-AACTTTGATTCTTTAGAGTCA-3', negative control shRNA 5'-AATTCTCCGAACGTGTCACGT-3'.

**Chromatin immunoprecipitation assay (ChIP)**

ChIP assay was performed as previously described (Yoshitane et al., 2014). Briefly, brain nuclear extracts were incubated in 1% formaldehyde for the cross-linking at RT for 15 min and the reactions were subsequently quenched by adding glycine (final 0.125 M). DNA was physically fragmented by sonication (25 sec pulse and 25 sec rest at power 30% was repeated 6 times). Antibody reaction and DNA purification were performed using the EZ-Magna ChIP A/G assay kit (EMD Millipore). ChIP signal was determined by real-time PCR using specific primers listed below (Koike et al., 2012).

ChIP-m*Per1*-E-box-fw:5' AGCCAGCCTGCACGTGTTCC 3'

ChIP-m*Per1*-E-box-rv:5' CAGAGACAACCCCGCCCTGC 3'

### **Metabolomics analysis**

HepG2 cells were transfected with *RFK* siRNA or control siRNA. Twenty-four hours after the transfection, cells were treated with FAD as well as labeled with D-glucose isotope (U-13C6) (Cambridge Isotope Laboratories, Inc., CLM-1396-PK) for 24 hours. Cells were rinsed with cold 150 mM NH<sub>4</sub>AcO (pH7.3) and collected with 1ml 80% MeOH, followed with addition of 5 nmol Norvaline (Sigma aldrich). Cell extracts were centrifuged at 14 krpm for 5 min. Extraction was repeated by adding 200 µl 80% MeOH to precipitate. Combined supernatant was dried down using SpeedVac. Metabolites were analyzed by Q Extractive mass spectrometry coupled to a UltiMate 3000 HPLC chromatography systems (Thermo Fisher Scientific).

**Table S1 Primer sequence used for real-time PCR analysis, related to Figure 4.**

| primer name        | primer sequence 5'-3'      |
|--------------------|----------------------------|
| mPer1-fw           | CAGGCTAACCAGGAATATTACCAGC  |
| mPer1-rv           | CACAGCCACAGAGAAGGTGTCCTGG  |
| mPer2-fw           | ATGCTCGCCATCCACAAGA        |
| mPer2-rv           | GCGGAATCGAATGGGAGAAT       |
| mCry1-fw           | CCCAGGCTTTTCAAGGAATGGAACA  |
| mCry1-rv           | TTCATCATGGTCATCAGACAGAGG   |
| mCry2-fw           | GGGACTCTGTCTATTGGCATCTG    |
| mCry2-rv           | GTCACTCTAGCCCGCTTGGT       |
| mDbp-fw            | AATGACCTTTGAACCTGATCCCGCT  |
| mDbp-rv            | GCTCCAGTACTTCTCATCCTTCTGT  |
| mReverba-fw        | GGGCACAAGCAACATTACCA       |
| mReverba-rv        | CACGTCCCCACACACCTTAC       |
| mPer3-fw           | CCGCCCCTACAGTCAGAAAG       |
| mPer3-rv           | GCCCCACGTGCTTAAATCCT       |
| mG6pc-fw           | TCGGAGACTGGTTCAACCTC       |
| mG6pc-rv           | AGGTGACAGGGAACTGCTTTAT     |
| mPck1-fw           | AAGCATTCAACGCCAGGTTC       |
| mPck1-rv           | GGGCGAGTCTGTCAGTTCAAT      |
| mPparg-fw          | CACAATGCCATCAGGTTTGG       |
| mPparg-rv          | GCTGGTCGATATCACTGGAGATC    |
| mScd1-fw           | TGCCCTGCGGATCTT            |
| mScd1-rv           | GCCCATTTCGTACACGTCATT      |
| mAcs1-fw           | GCTGCCGACGGGATCAG          |
| mAcs1-rv           | TCCAGACACATTGAGCATGTCAAT   |
| mPfk1-fw           | TGCAGCCTACAATCTGCTCC       |
| mPfk1-rv           | GTCAAGTGTGCGTAGTTCTGA      |
| mPgc1 $\alpha$ -fw | AGCCGTGACCACTGACAACGAG     |
| mPgc1 $\alpha$ -rv | AGCCGTGACCACTGACAACGAG     |
| mIrs2-fw           | GGAGAACCCAGACCCTAAGCTACT   |
| mIrs2-rv           | GATGCCTTTGAGGCCTTAC        |
| mGlut1-fw          | CGTGCTTATG GGTTCCTCCAAA    |
| mGlut1-rv          | GACACCTCCCCACATACATG       |
| mGlut3-fw          | TGAAGCCATGA GCTTTGTCTGT    |
| mGlut3-rv          | GCCCTGGCT GAAGAGTTCAG      |
| mGlut4-fw          | CAACTGGACCTGTAACCTTCATCGT  |
| mGlut4-rv          | ACGGCAAATAGAAGGAAGACGTA    |
| mGlut5-fw          | CCAATATGGGTACAACGTAGCTG    |
| mGlut5-rv          | GCGTCAAGGTGAAGGACTCAATA    |
| mG3pdh-fw          | ACGGGAAGCTCACTGGCATGGCCTT  |
| mG3pdh-rv          | CATGAGGTCCACCACCCTGTTGCTG  |
| mTbp-fw            | ACCTAAAGACCATTGCACTTCG     |
| mTbp-rv            | GCTCTCTTATTCTCATGATGACTGC  |
| mRfk-fw            | TGGAAACACACATCATCCATACC    |
| mRfk-rv            | CACCTTGAATTGCAGAAATAAGTGAC |
| mFlad1-fw          | CCTCTCCATGCAGCCGTG         |
| mFlad1-rv          | CGGCTTCTAACACCTGGAGATTATAC |



## **SUPPELEMENTAL REFERENCES**

Hirano, A., Shi, G., Jones, C.R., Lipzen, A., Pennacchio, L.A., Xu, Y., Hallows, W.C., McMahon, T., Yamazaki, M., Ptáček, L.J., et al. (2016). A Cryptochrome 2 mutation yields advanced sleep phase in humans. *eLife* 5, e16695.

Yoshitane, H., Ozaki, H., Terajima, H., Du, N.H., Suzuki, Y., Fujimori, T., Kosaka, N., Shimba, S., Sugano, S., Takagi, T., et al. (2014). CLOCK-Controlled Polyphonic Regulation of Circadian Rhythms through Canonical and Noncanonical E-Boxes. *Molecular and Cellular Biology* 34, 1776–1787.
